# Supplementary material
Source: Springer Nature journal article supplement (https://www.springerprofessional.de/resource/supplementary/13673_2011_13_MOESM2_ESM.pdf/11899344)
Supplement: MOESM2 [file 11899344]

Average number of jobs Completed

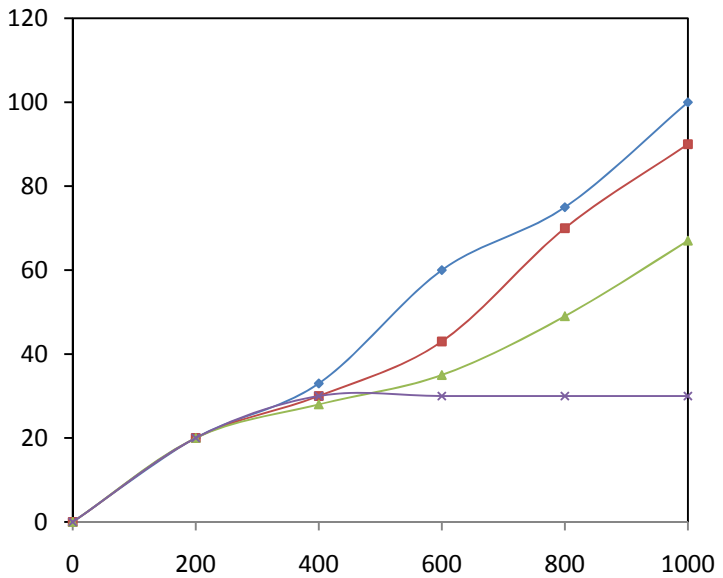

- SSF\_P, proposed framework (with zero fault)
- proposed framework
- SHAPC
- SSF\_P

Time (ms)
